# Supplementary material
Source: MDPI journal article supplement (https://www.mdpi.com/2624-6120/4/3/26)
Supplement: s1 [file s1]

# Supplementary material

Table S1. Mean weighted frequency values (Hz) calculated from the intrinsic mode functions extracted from the EEG of thirty-four healthy volunteers using two spectral methods.

| Lead | Method | IMF1          | IMF2          | IMF3          | IMF4       | IMF5         | IMF6         |
|------|--------|---------------|---------------|---------------|------------|--------------|--------------|
| Fp1  | FFT    | 44.36 ± 3.8   | 26.08 ± 1.8   | 12.53 ± 1.5   | 8.47 ± 0.9 | 4.25 ± 0.4   | 2.29 ± 0.3   |
|      | HHT    | 49.85 ± 2.9 ↑ | 29.23 ± 1.9 ↑ | 13.64 ± 1.7 ↑ | 8.46 ± 0.9 | 4.28 ± 0.4   | 2.18 ± 0.3 ↓ |
| Fp2  | FFT    | 44.23 ± 4.0   | 26.12 ± 1.8   | 12.51 ± 1.5   | 8.44 ± 0.9 | 4.24 ± 0.4   | 2.26 ± 0.2   |
|      | HHT    | 49.81 ± 3.0 ↑ | 29.28 ± 1.8 ↑ | 13.59 ± 1.7 ↑ | 8.39 ± 1.0 | 4.24 ± 0.4   | 2.15 ± 0.3 ↓ |
| F3   | FFT    | 43.95 ± 3.7   | 25.99 ± 1.9   | 12.53 ± 1.5   | 8.49 ± 0.9 | 4.29 ± 0.3   | 2.27 ± 0.2   |
|      | HHT    | 49.64 ± 2.6 ↑ | 29.24 ± 2.0 ↑ | 13.65 ± 1.7 ↑ | 8.41 ± 1.0 | 4.30 ± 0.3   | 2.19 ± 0.3 ↓ |
| F4   | FFT    | 43.77 ± 3.4   | 25.95 ± 1.8   | 12.50 ± 1.5   | 8.43 ± 0.9 | 4.24 ± 0.4   | 2.27 ± 0.2   |
|      | HHT    | 49.51 ± 2.4 ↑ | 29.30 ± 1.9 ↑ | 13.67 ± 1.7 ↑ | 8.34 ± 0.9 | 4.23 ± 0.4   | 2.19 ± 0.3 ↓ |
| C3   | FFT    | 43.52 ± 3.7   | 25.80 ± 1.8   | 12.33 ± 1.4   | 8.68 ± 0.9 | 4.30 ± 0.4   | 2.26 ± 0.3   |
|      | HHT    | 49.50 ± 2.6 ↑ | 29.40 ± 1.9 ↑ | 13.45 ± 1.6 ↑ | 8.71 ± 1.0 | 4.33 ± 0.4   | 2.18 ± 0.3 ↓ |
| C4   | FFT    | 43.71 ± 4.0   | 25.81 ± 2.0   | 12.24 ± 1.3   | 8.70 ± 0.9 | 4.29 ± 0.4   | 2.27 ± 0.2   |
|      | HHT    | 49.83 ± 2.8 ↑ | 29.37 ± 2.1 ↑ | 13.44 ± 1.5 ↑ | 8.72 ± 1.0 | 4.28 ± 0.4   | 2.18 ± 0.3 ↓ |
| P3   | FFT    | 43.45 ± 4.0   | 25.78 ± 1.8   | 12.36 ± 1.3   | 8.99 ± 0.9 | 4.35 ± 0.4   | 2.27 ± 0.2   |
|      | HHT    | 49.57 ± 2.6 ↑ | 29.38 ± 1.9 ↑ | 13.53 ± 1.6 ↑ | 8.98 ± 1.1 | 4.35 ± 0.4   | 2.17 ± 0.3 ↓ |
| P4   | FFT    | 43.49 ± 3.8   | 25.66 ± 1.8   | 12.30 ± 1.2   | 8.96 ± 1.0 | 4.31 ± 0.4   | 2.30 ± 0.3   |
|      | HHT    | 49.57 ± 2.5 ↑ | 29.34 ± 2.0 ↑ | 13.53 ± 1.5 ↑ | 8.98 ± 1.2 | 4.29 ± 0.4   | 2.20 ± 0.3 ↓ |
| O1   | FFT    | 43.62 ± 3.6   | 25.66 ± 1.7   | 12.10 ± 1.2   | 9.10 ± 1.1 | 4.34 ± 0.4   | 2.31 ± 0.2   |
|      | HHT    | 49.54 ± 2.3 ↑ | 29.33 ± 1.7 ↑ | 13.28 ± 1.6 ↑ | 9.15 ± 1.2 | 4.35 ± 0.4   | 2.22 ± 0.3 ↓ |
| O2   | FFT    | 43.43 ± 3.2   | 25.80 ± 1.6   | 12.00 ± 1.3   | 9.28 ± 1.1 | 4.37 ± 0.4   | 2.34 ± 0.3   |
|      | HHT    | 49.30 ± 1.7 ↑ | 29.45 ± 1.7 ↑ | 13.16 ± 1.6 ↑ | 9.36 ± 1.3 | 4.32 ± 0.4 ↓ | 2.26 ± 0.3 ↓ |
| F7   | FFT    | 43.86 ± 3.2   | 25.93 ± 1.8   | 12.55 ± 1.5   | 8.55 ± 0.9 | 4.27 ± 0.3   | 2.31 ± 0.2   |
|      | HHT    | 49.37 ± 2.3 ↑ | 29.04 ± 1.8 ↑ | 13.68 ± 1.7 ↑ | 8.54 ± 1.0 | 4.23 ± 0.3   | 2.19 ± 0.3 ↓ |
| F8   | FFT    | 44.07 ± 3.7   | 26.04 ± 1.9   | 12.46 ± 1.4   | 8.51 ± 0.9 | 4.23 ± 0.4   | 2.35 ± 0.2   |
|      | HHT    | 49.64 ± 2.6 ↑ | 29.30 ± 1.9 ↑ | 13.56 ± 1.6 ↑ | 8.47 ± 1.0 | 4.23 ± 0.4   | 2.25 ± 0.3 ↓ |
| T3   | FFT    | 43.84 ± 3.3   | 26.03 ± 1.9   | 12.56 ± 1.4   | 8.64 ± 0.9 | 4.31 ± 0.4   | 2.28 ± 0.2   |
|      | HHT    | 49.40 ± 2.3 ↑ | 29.27 ± 1.8 ↑ | 13.66 ± 1.6 ↑ | 8.68 ± 1.1 | 4.28 ± 0.3   | 2.19 ± 0.3 ↓ |
| T4   | FFT    | 43.91 ± 3.5   | 26.01 ± 2.0   | 12.44 ± 1.3   | 8.67 ± 1.0 | 4.33 ± 0.4   | 2.32 ± 0.3   |
|      | HHT    | 49.49 ± 2.2 ↑ | 29.23 ± 1.8 ↑ | 13.54 ± 1.4 ↑ | 8.66 ± 1.1 | 4.31 ± 0.3   | 2.23 ± 0.3 ↓ |
| T5   | FFT    | 43.99 ± 3.9   | 25.85 ± 1.8   | 12.40 ± 1.3   | 8.98 ± 1.0 | 4.35 ± 0.3   | 2.27 ± 0.3   |
|      | HHT    | 49.67 ± 2.7 ↑ | 29.16 ± 1.6 ↑ | 13.56 ± 1.5 ↑ | 9.02 ± 1.2 | 4.30 ± 0.3 ↓ | 2.17 ± 0.3 ↓ |
| T6   | FFT    | 43.71 ± 3.6   | 25.92 ± 1.7   | 12.41 ± 1.3   | 8.91 ± 1.1 | 4.40 ± 0.4   | 2.32 ± 0.3   |
|      | HHT    | 49.50 ± 2.4 ↑ | 29.42 ± 1.8 ↑ | 13.59 ± 1.6 ↑ | 9.00 ± 1.3 | 4.37 ± 0.4   | 2.21 ± 0.3 ↓ |
| Fz   | FFT    | 43.89 ± 3.7   | 25.98 ± 1.6   | 12.53 ± 1.6   | 8.38 ± 0.9 | 4.17 ± 0.3   | 2.28 ± 0.3   |
|      | HHT    | 50.00 ± 2.8 ↑ | 29.47 ± 1.9 ↑ | 13.77 ± 1.8 ↑ | 8.34 ± 0.9 | 4.19 ± 0.3   | 2.21 ± 0.3 ↓ |
| Cz   | FFT    | 43.22 ± 3.2   | 25.82 ± 1.8   | 12.33 ± 1.4   | 8.62 ± 0.9 | 4.27 ± 0.4   | 2.29 ± 0.3   |
|      | HHT    | 49.40 ± 2.3 ↑ | 29.41 ± 1.9 ↑ | 13.50 ± 1.7 ↑ | 8.61 ± 0.9 | 4.29 ± 0.4   | 2.19 ± 0.3 ↓ |
| Pz   | FFT    | 43.06 ± 3.3   | 25.76 ± 1.7   | 12.21 ± 1.2   | 8.90 ± 1.0 | 4.36 ± 0.4   | 2.29 ± 0.3   |
|      | HHT    | 49.35 ± 2.4 ↑ | 29.37 ± 2.0 ↑ | 13.36 ± 1.5 ↑ | 8.86 ± 1.1 | 4.37 ± 0.5   | 2.20 ± 0.3 ↓ |

Results are expressed as mean ± standard deviation; ↑\_ Significant higher, or ↓\_ lower values (p < 0.05) for the ANOVA “F” statistics of values calculated using the FFT or the HHT methods. FFT\_ Fast Fourier Transform; HHT\_ Hilbert Huang Transform.

Table S2. Power spectral density expressed in normalized units (%) calculated from the intrinsic mode functions extracted from the EEG of thirty-four healthy volunteers using two spectral methods.

| Lead | Method | IMF1         | IMF2          | IMF3           | IMF4           | IMF5          | IMF6         |
|------|--------|--------------|---------------|----------------|----------------|---------------|--------------|
| Fp1  | FFT    | 6.72 ± 6.3   | 13.41 ± 8.4   | 42.75 ± 15.4   | 22.40 ± 8.5    | 10.77 ± 5.4   | 3.94 ± 1.8   |
|      | HHT    | 7.02 ± 6.3   | 13.57 ± 8.2   | 42.43 ± 15.2   | 22.19 ± 8.3    | 10.69 ± 5.4 ↓ | 4.11 ± 1.8   |
| Fp2  | FFT    | 6.33 ± 4.8   | 13.22 ± 8.3   | 42.72 ± 15.3   | 22.44 ± 8.7    | 11.14 ± 5.7   | 4.15 ± 2.1   |
|      | HHT    | 6.61 ± 4.9   | 13.39 ± 8.2   | 42.50 ± 15.2   | 22.19 ± 8.4    | 10.99 ± 5.5   | 4.32 ± 2.1   |
| F3   | FFT    | 5.63 ± 3.8   | 13.60 ± 8.8   | 45.13 ± 15.7   | 22.82 ± 8.7    | 9.67 ± 4.7    | 3.16 ± 1.4   |
|      | HHT    | 5.94 ± 4.0   | 13.79 ± 8.7   | 44.89 ± 15.4   | 22.54 ± 8.5    | 9.55 ± 4.7    | 3.29 ± 1.4   |
| F4   | FFT    | 5.17 ± 3.3   | 13.37 ± 8.5   | 45.29 ± 15.8   | 22.67 ± 8.6    | 10.13 ± 5.3   | 3.38 ± 1.8   |
|      | HHT    | 5.46 ± 3.5   | 13.59 ± 8.4   | 45.09 ± 15.6   | 22.34 ± 8.3    | 10.01 ± 5.2   | 3.50 ± 1.8   |
| C3   | FFT    | 4.84 ± 4.4   | 12.56 ± 8.3   | 48.69 ± 14.4   | 22.85 ± 9.1    | 8.52 ± 4.8    | 2.55 ± 1.4   |
|      | HHT    | 5.10 ± 4.5   | 12.81 ± 8.2   | 48.43 ± 14.3   | 22.61 ± 8.9    | 8.40 ± 4.7    | 2.65 ± 1.4 ↑ |
| C4   | FFT    | 4.39 ± 3.6   | 12.10 ± 7.9   | 49.49 ± 13.6   | 22.85 ± 8.7    | 8.61 ± 4.9    | 2.56 ± 1.3   |
|      | HHT    | 4.63 ± 3.8   | 12.32 ± 7.8   | 49.20 ± 13.6   | 22.66 ± 8.5    | 8.56 ± 4.9    | 2.63 ± 1.3   |
| P3   | FFT    | 4.29 ± 6.8   | 9.90 ± 7.7    | 50.89 ± 14.7   | 24.96 ± 11.3   | 7.50 ± 4.8    | 2.45 ± 1.5   |
|      | HHT    | 4.49 ± 6.9   | 10.14 ± 7.6   | 50.58 ± 14.7   | 24.76 ± 11.1   | 7.47 ± 4.8    | 2.56 ± 1.5 ↑ |
| P4   | FFT    | 3.69 ± 3.9   | 10.30 ± 8.0   | 51.17 ± 13.6   | 24.46 ± 10.2   | 8.00 ± 4.6    | 2.38 ± 1.2   |
|      | HHT    | 3.87 ± 4.0   | 10.49 ± 7.9   | 50.91 ± 13.7   | 24.30 ± 10.1   | 7.96 ± 4.6    | 2.48 ± 1.2 ↑ |
| O1   | FFT    | 3.39 ± 3.3   | 8.67 ± 7.2    | 53.81 ± 14.9   | 24.82 ± 11.7   | 7.05 ± 4.1    | 2.27 ± 1.1   |
|      | HHT    | 3.55 ± 3.4 ↑ | 8.82 ± 7.1 ↑  | 53.41 ± 14.8   | 24.80 ± 11.5   | 7.04 ± 4.1    | 2.38 ± 1.1   |
| O2   | FFT    | 2.95 ± 2.9   | 7.90 ± 6.8    | 55.86 ± 15.4   | 24.8 ± 12.1    | 6.51 ± 3.8    | 1.99 ± 0.9   |
|      | HHT    | 3.12 ± 3.1 ↑ | 8.04 ± 6.8 ↑  | 55.49 ± 15.3 ↓ | 24.82 ± 12.1   | 6.47 ± 3.8 ↓  | 2.07 ± 0.9 ↑ |
| F7   | FFT    | 6.03 ± 4.8   | 12.89 ± 7.4   | 43.50 ± 14.8   | 23.48 ± 8.7    | 10.49 ± 5.1   | 3.62 ± 1.6   |
|      | HHT    | 6.34 ± 5.0   | 13.10 ± 7.3 ↑ | 43.13 ± 14.5   | 23.22 ± 8.5    | 10.43 ± 5.1   | 3.79 ± 1.6   |
| F8   | FFT    | 6.40 ± 5.1   | 12.71 ± 7.2   | 43.77 ± 14.5   | 22.53 ± 8.5    | 10.90 ± 5.4   | 3.69 ± 1.7   |
|      | HHT    | 6.67 ± 5.2   | 12.91 ± 7.1   | 43.43 ± 14.4   | 22.31 ± 8.3    | 10.84 ± 5.2 ↑ | 3.85 ± 1.8   |
| T3   | FFT    | 7.26 ± 5.7   | 13.57 ± 7.8   | 44.30 ± 13.9   | 23.40 ± 9.0    | 8.69 ± 4.6    | 2.76 ± 1.3   |
|      | HHT    | 7.62 ± 5.9   | 13.81 ± 7.7   | 43.96 ± 13.7   | 23.09 ± 8.7    | 8.64 ± 4.6    | 2.87 ± 1.4   |
| T4   | FFT    | 7.26 ± 6.0   | 13.83 ± 8.0   | 45.27 ± 13.2   | 22.21 ± 8.4    | 8.75 ± 5.0    | 2.68 ± 1.3   |
|      | HHT    | 7.55 ± 6.2   | 14.02 ± 7.9   | 44.93 ± 13.3   | 22.02 ± 8.4    | 8.70 ± 4.9    | 2.77 ± 1.3   |
| T5   | FFT    | 4.97 ± 3.9   | 10.69 ± 6.8   | 47.51 ± 13.3   | 26.31 ± 11.2   | 7.95 ± 4.6    | 2.57 ± 1.1   |
|      | HHT    | 5.21 ± 4.1   | 10.91 ± 6.7   | 47.09 ± 13.3   | 26.19 ± 11.2 ↓ | 7.92 ± 4.5    | 2.69 ± 1.2 ↑ |
| T6   | FFT    | 4.83 ± 4.9   | 10.65 ± 7.3   | 48.75 ± 14.6   | 25.39 ± 11.2   | 7.86 ± 4.8    | 2.52 ± 1.2   |
|      | HHT    | 5.06 ± 5.0   | 10.84 ± 7.3   | 48.40 ± 14.6   | 25.25 ± 11.1   | 7.84 ± 4.8    | 2.61 ± 1.2   |
| Fz   | FFT    | 4.15 ± 2.7   | 12.18 ± 8.5   | 45.51 ± 16.6   | 23.97 ± 9.5    | 10.84 ± 5.8   | 3.36 ± 1.9   |
|      | HHT    | 4.40 ± 2.8   | 12.35 ± 8.3   | 45.29 ± 16.3   | 23.75 ± 9.2    | 10.72 ± 5.7   | 3.50 ± 1.9   |
| Cz   | FFT    | 3.38 ± 2.7   | 12.38 ± 8.9   | 48.28 ± 15.1   | 23.48 ± 9.6    | 9.59 ± 5.4    | 2.88 ± 1.5   |
|      | HHT    | 3.62 ± 2.9   | 12.59 ± 8.8   | 48.04 ± 15.0   | 23.29 ± 9.4    | 9.50 ± 5.4    | 2.97 ± 1.5   |
| Pz   | FFT    | 2.88 ± 2.8   | 10.41 ± 8.9   | 51.81 ± 15.1   | 24.21 ± 10.7   | 8.12 ± 5.1    | 2.57 ± 1.4   |
|      | HHT    | 3.07 ± 2.9 ↑ | 10.62 ± 8.8   | 51.51 ± 14.9   | 24.05 ± 10.5   | 8.07 ± 5.0    | 2.67 ± 1.4   |

Results are expressed as mean ± standard deviation; ↑\_ Significant higher, or ↓\_ lower values (p < 0.05) for the ANOVA “F” statistics of values calculated using the FFT or the HHT methods; original values required a *logit* transformation to achieve a normal distribution before the statistical testing. FFT\_ Fast Fourier Transform; HHT\_ Hilbert Huang Transform.
